# Supplementary material
Source: ML conference proceedings conference paper supplement (https://openaccess.thecvf.com/content/CVPR2022/html/Athar_HODOR_High-Level_Object_CVPR_2022_paper.html)
Supplement: Supplementary file 2 [file Athar_HODOR_High-Level_Object_CVPR_2022_supplemental.zip]

Archive with 2 entries (2 files):
- supplementary.pdf
- video.mp4
